# Supplementary material for: DFT insights into structural effects of Ni–Cu/CeO2catalysts for CO selective reaction towards water–gas shift
Source: Royal Society of Chemistry journal article supplement (doi:10.1039/d0cp05613h), 2021-01-01
Supplement: d0cp05613h1.pdf [file d0cp05613h1.pdf]

## SUPPLEMENTARY INFORMATION

### DFT insights into structural effects of Ni-Cu/CeO<sub>2</sub> catalysts for CO selective reaction towards Water-Gas Shift

*Agustín Salcedo<sup>ab</sup>, Beatriz Irigoyen<sup>ab\*</sup>*

<sup>a</sup>Universidad de Buenos Aires. Facultad de Ingeniería. Departamento de Ingeniería Química.  
Pabellón de Industrias, Ciudad Universitaria, C1428EGA Buenos Aires, Argentina.

<sup>b</sup>CONICET–Universidad de Buenos Aires. Instituto de Tecnologías del Hidrógeno y  
Energías Sostenibles (ITHES). Pabellón de Industrias, Ciudad Universitaria, C1428EGA  
Buenos Aires, Argentina.

#### Corresponding Author

\*beatriz@di.fcen.uba.ar

#### 1. CeO<sub>2</sub>(111) slab

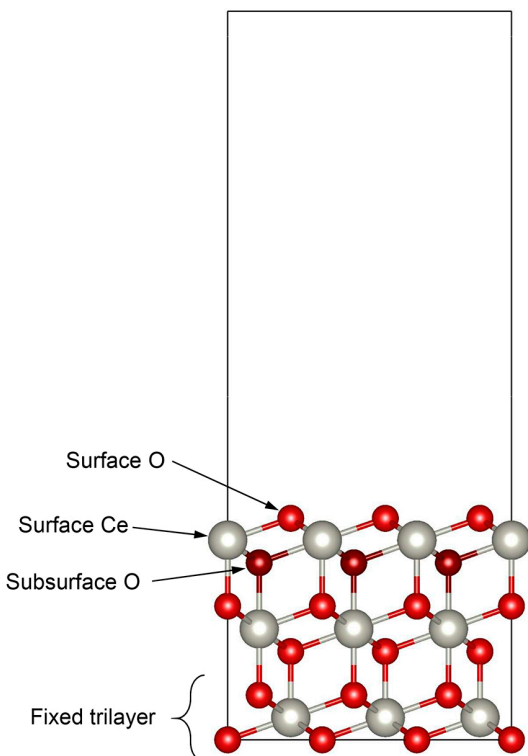

**Figure S1.** CeO<sub>2</sub>(111) slab.

## 2. Supported and gas-phase clusters

**Table S1.** Calculated total magnetic moment ( $M_{\text{tot}}$ ), binding energies ( $E_{\text{bin}}$ ), adsorption energies ( $E_{\text{ads}}$ ) and excess energies ( $E_{\text{exc}}$ ) of  $\text{Ni}_{4-x}\text{Cu}_x$  clusters. “t” and “r” indicate tetrahedral and rhombohedral clusters respectively.

| Cluster                  | Gas-phase                          |   |                          |      |                       |      | Supported                          |   |                       |       |                       |      |
|--------------------------|------------------------------------|---|--------------------------|------|-----------------------|------|------------------------------------|---|-----------------------|-------|-----------------------|------|
|                          | $M_{\text{tot}}$ ( $\mu\text{B}$ ) |   | $E_{\text{bin}}$ (eV/at) |      | $E_{\text{exc}}$ (eV) |      | $M_{\text{tot}}$ ( $\mu\text{B}$ ) |   | $E_{\text{ads}}$ (eV) |       | $E_{\text{exc}}$ (eV) |      |
|                          | t                                  | r | t                        | r    | t                     | r    | t                                  | r | t                     | r     | t                     | r    |
| $\text{Ni}_4$            | 4                                  | 4 | 2.51                     | 2.48 | -                     | -    | 4                                  | 4 | -6.79                 | -6.66 | -                     | -    |
| $\text{Ni}_3\text{Cu}_1$ | 1                                  | 3 | 2.18                     | 2.25 | 0.41                  | 0.13 | 3                                  | 3 | -6.96                 | -6.54 | -0.35                 | 0.08 |
| $\text{Ni}_2\text{Cu}_2$ | 0                                  | 2 | 1.89                     | 2.01 | 0.66                  | 0.17 | 2                                  | 2 | -6.33                 | -6.19 | 0.01                  | 0.14 |
| $\text{Ni}_1\text{Cu}_3$ | 0                                  | 1 | 1.61                     | 1.76 | 0.87                  | 0.27 | 1                                  | 1 | -5.89                 | -5.94 | 0.23                  | 0.18 |
| $\text{Cu}_4$            | -                                  | 0 | -                        | 1.60 | -                     | -    | 0                                  | 0 | -5.54                 | -5.32 | -                     | -    |

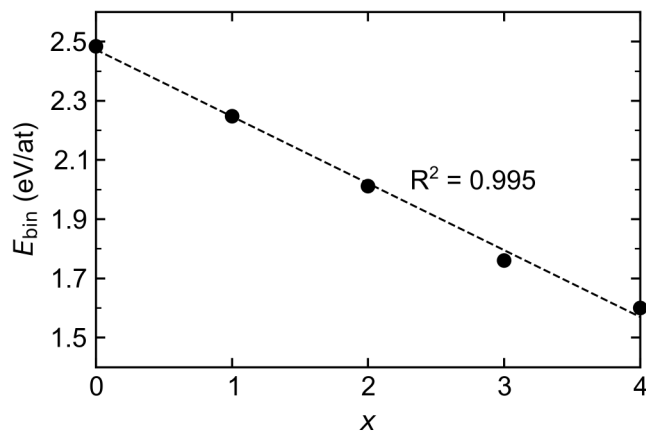

**Figure S2.** Binding energies for the most stable (rhombohedral) isomers as a function of the number of Cu atoms in the cluster ( $x$ ). Linear fitting is shown as a dashed line.

### 3. Bader charge analysis

**Table S2.** Bader charge difference ( $\Delta q$  in  $|e|$ ) for Ni and Cu atoms of the pyramidal  $\text{Ni}_{4-x}\text{Cu}_x$  clusters upon adsorption on the  $\text{CeO}_2(111)$  surface, as well as the reduced Ce ions.

| Cluster                             | Apex   | Base atoms             | Ce ions      |
|-------------------------------------|--------|------------------------|--------------|
| <b>Ni<sub>4</sub></b>               | 0.033  | -0.328, -0.332, -0.322 | 0.302, 0.304 |
| <b>Ni<sub>3</sub>Cu<sub>1</sub></b> | 0.020  | -0.330, -0.321, -0.317 | 0.302, 0.302 |
| <b>Ni<sub>2</sub>Cu<sub>2</sub></b> | 0.017  | -0.342, -0.324, -0.300 | 0.302, 0.302 |
| <b>Ni<sub>1</sub>Cu<sub>3</sub></b> | 0.002  | -0.314, -0.338, -0.332 | 0.301, 0.299 |
| <b>Cu<sub>4</sub></b>               | -0.010 | -0.317, -0.327, -0.345 | 0.326, 0.325 |

**Table S3.** Vacancy formation energies and Bader charge differences for Ni and Cu atoms in pyramidal  $\text{Ni}_{4-x}\text{Cu}_x$  clusters supported on an O-defective and a hydroxylated  $\text{CeO}_2(111)$  surface, compared to the clusters adsorbed on the clean stoichiometric surface.

| Cluster                             | $E_{\text{vac}}$ (eV) | $\Delta q$ ( $ e $ ) O-defective |            |        | $\Delta q$ ( $ e $ ) Hydroxylated |            |        |       |       |
|-------------------------------------|-----------------------|----------------------------------|------------|--------|-----------------------------------|------------|--------|-------|-------|
|                                     |                       | Apex                             | Base atoms |        | Apex                              | Base atoms |        |       |       |
| <b>Ni<sub>4</sub></b>               | 1.96                  | 0.014                            | -0.011     | 0.018  | 0.022                             | 0.020      | 0.008  | 0.010 | 0.035 |
| <b>Ni<sub>3</sub>Cu<sub>1</sub></b> | 1.96                  | 0.007                            | 0.021      | -0.009 | 0.019                             | 0.017      | 0.031  | 0.018 | 0.001 |
| <b>Ni<sub>2</sub>Cu<sub>2</sub></b> | 1.96                  | 0.011                            | 0.004      | 0.016  | 0.010                             | 0.020      | 0.011  | 0.019 | 0.003 |
| <b>Ni<sub>1</sub>Cu<sub>3</sub></b> | 1.97                  | 0.011                            | 0.015      | 0.002  | 0.015                             | 0.020      | 0.015  | 0.006 | 0.012 |
| <b>Cu<sub>4</sub></b>               | 1.98                  | 0.016                            | -0.004     | 0.012  | 0.014                             | 0.023      | -0.006 | 0.014 | 0.025 |

**Table S4.** Bader charge difference ( $\Delta q$  in  $|e|$ ) for C, O, Ni and Cu upon on-top adsorption of CO on the pyramidal  $\text{Ni}_{4-x}\text{Cu}_x$  clusters supported on  $\text{CeO}_2(111)$ .

| Cluster                             | C     | O     | CO    | Apex   | Base atoms |       |        |
|-------------------------------------|-------|-------|-------|--------|------------|-------|--------|
| <b>Ni<sub>4</sub></b>               | 0.146 | 0.058 | 0.204 | -0.215 | 0.067      | 0.010 | -0.034 |
| <b>Ni<sub>3</sub>Cu<sub>1</sub></b> | 0.039 | 0.078 | 0.117 | -0.225 | 0.058      | 0.016 | 0.027  |
| <b>Ni<sub>2</sub>Cu<sub>2</sub></b> | 0.039 | 0.082 | 0.121 | -0.238 | 0.034      | 0.039 | 0.039  |
| <b>Ni<sub>1</sub>Cu<sub>3</sub></b> | 0.045 | 0.035 | 0.079 | -0.199 | 0.020      | 0.047 | 0.045  |
| <b>Cu<sub>4</sub></b>               | 0.048 | 0.007 | 0.055 | -0.190 | 0.037      | 0.036 | 0.042  |

#### 4. Density of states

**Table S5.** Integration of the density of states projected onto the d-states of Ni and Cu atoms in the supported  $\text{Ni}_{4-x}\text{Cu}_x$  clusters, in the range of 0 to 8.0 eV (empty states).

| Site             | Band       | $\text{Cu}_4/\text{CeO}_2(111)$ | $\text{Ni}_4/\text{CeO}_2(111)$ | $\text{Ni}_3\text{Cu}_1/\text{CeO}_2(111)$ |
|------------------|------------|---------------------------------|---------------------------------|--------------------------------------------|
| Base<br>(3 ions) | dxy        | 0.224                           | 0.860                           | 0.829                                      |
|                  | dyz        | 0.322                           | 0.746                           | 0.636                                      |
|                  | $dz^2$     | 0.303                           | 1.100                           | 1.187                                      |
|                  | dxz        | 0.335                           | 0.653                           | 0.656                                      |
|                  | $dx^2-y^2$ | 0.229                           | 0.833                           | 0.812                                      |
|                  | dtotal     | 1.414                           | 4.192                           | 4.121                                      |
|                  | s          | 0.591                           | 0.472                           | 0.482                                      |
| Apex<br>(1 ion)  | dxy        | 0.040                           | 0.133                           | 0.040                                      |
|                  | dyz        | 0.087                           | 0.358                           | 0.092                                      |
|                  | $dz^2$     | 0.053                           | 0.084                           | 0.054                                      |
|                  | dxz        | 0.087                           | 0.281                           | 0.093                                      |
|                  | $dx^2-y^2$ | 0.040                           | 0.330                           | 0.040                                      |
|                  | dtotal     | 0.306                           | 1.186                           | 0.319                                      |
|                  | s          | 0.237                           | 0.197                           | 0.214                                      |

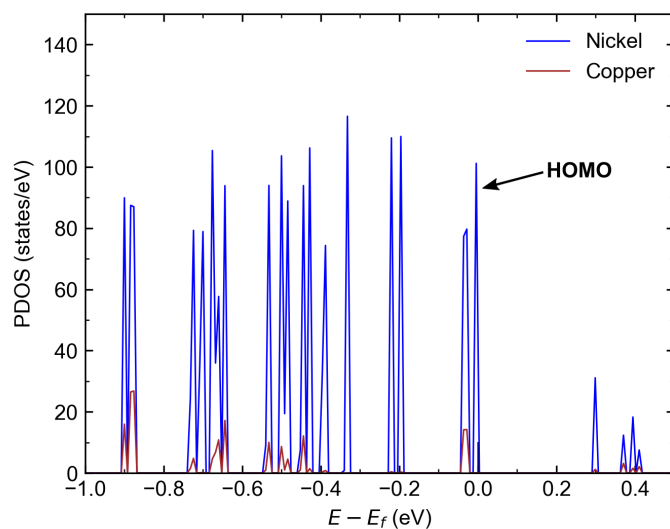

**Figure S3.** Projected density of states (PDOS) onto the d-states of Ni and Cu atoms in the  $\text{Ni}_3\text{Cu}_1$  gas-phase cluster. The energy is referred to the Fermi level ( $E_f$ ). The highest occupied molecular orbital is indicated by an arrow.

## 5. CO adsorption on supported $\text{Ni}_{4-x}\text{Cu}_x$ clusters

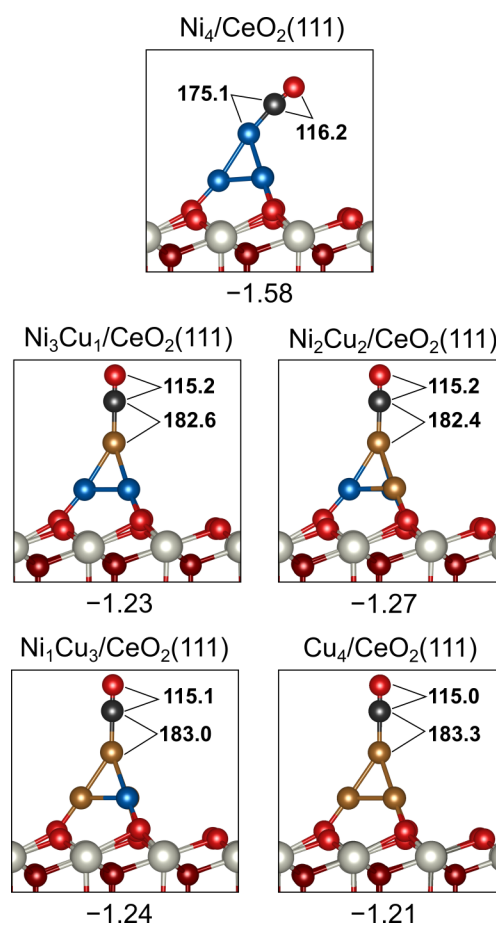

**Figure S4.** Geometric structures, adsorption energies (eV) and distances (pm), for CO adsorbed on the apex atom of supported  $\text{Ni}_{4-x}\text{Cu}_x$  clusters. Carbon is represented in black. Nickel and copper in blue and brown, respectively. Ce cations in light gray, and surface/subsurface oxygen in light/dark red.

## 6. d-band center analysis

**Table S6.** d-band center energy (eV) of tetrahedral  $\text{Ni}_{4-x}\text{Cu}_x$  clusters supported on  $\text{CeO}_2(111)$ , evaluated using both the classic Hammer-Nørskov method (HN) and the Bhattacharjee-Waghmare-Lee correction (BWL). The average d-band center ( $\bar{\epsilon}_d$ ) of  $\text{Ni}_{4-x}\text{Cu}_x$  clusters as well as the d-band center of their apex atoms ( $\epsilon_d^{\text{apex}}$ ) are reported.

| $x$ | HN                 |                            | BWL                |                            |
|-----|--------------------|----------------------------|--------------------|----------------------------|
|     | $\bar{\epsilon}_d$ | $\epsilon_d^{\text{apex}}$ | $\bar{\epsilon}_d$ | $\epsilon_d^{\text{apex}}$ |
| 0   | -1.10              | -0.99                      | -1.21              | -1.09                      |
| 1   | -1.34              | -1.80                      | -1.42              | -1.80                      |
| 2   | -1.43              | -1.68                      | -1.48              | -1.68                      |
| 3   | -1.66              | -1.93                      | -1.68              | -1.93                      |
| 4   | -1.74              | -1.83                      | -1.74              | -1.83                      |

## 7. Calculation of transition states

Transition state (TS) structures were located using the climbing image nudged elastic band method (CI-NEB) with a spring force of 5 eV/Å. A 6-layer (2 TL) p(3×3) slab was used in these calculations. Full relaxation of atomic coordinates was allowed for the ions located in the three uppermost layers, keeping the bottom layers fixed. Forces were converged to 0.15 eV/Å. Vibrational frequencies were calculated to verify the transition states, using finite differences as implemented in VASP, with atomic displacements of ±0.015 Å.

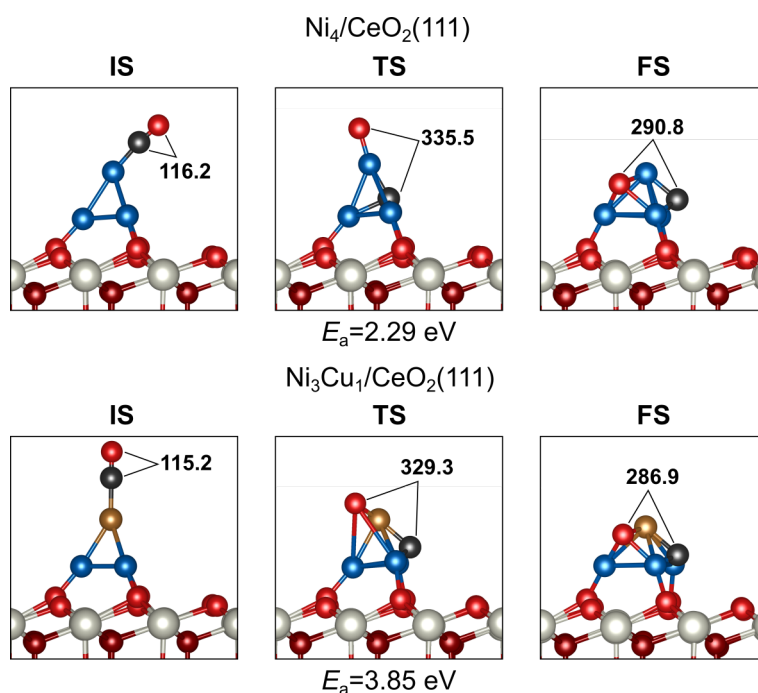

**Figure S5.** Initial state (IS), transition state (TS), final state (FS) and distances (pm), for CO dissociation on the Ni<sub>4</sub> and Ni<sub>3</sub>Cu<sub>1</sub> clusters supported on CeO<sub>2</sub>(111). Carbon is represented in black. Nickel and copper in blue and brown, respectively. Ce cations in light gray, and surface/subsurface oxygen in light/dark red.
